# Supplementary material for: QTL analysis to identify genes involved in the trade-off between silk protein synthesis and larva-pupa transition in silkworms
Source: Springer Nature journal article supplement (doi:10.1186/s12711-024-00937-z), 2024-09-30

a

Calculate  $\pi$  of original / target group\* in whole Chr11 (5-0.5 Kb window)

Delete the windows of  $n\_variants < 10$  and  $\pi_{original} \leq$  lowest 5%

Delete the windows unique to  $\pi_{target}$  compared with  $\pi_{original}$

Find the windows unique to  $\pi_{original}$  and fill up corresponding  $\pi_{target}$  with 0

Calculate ROD ( $1 - \pi_{target} / \pi_{original}$ )

Calculate  $F_{ST}$  between original / target group

**Cut-off**

$\pi_{target} \leq$  lowest 5%

$F_{ST} \geq$  top 5% or 1%

ROD  $\geq$  top 5%

\*original group: Wild for domestication and Local for breeding;  
target group: Local for domestication and CHN-I/JPN-I for breeding

b

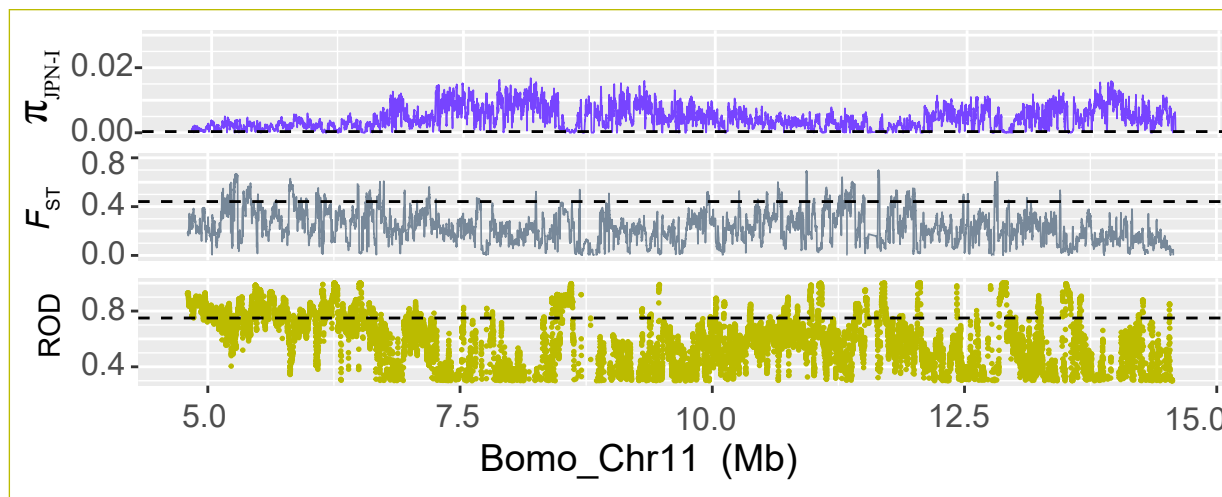

Supplement: MOESM3 [file 12711_2024_937_MOESM3_ESM.pdf]
