# Supplementary material for: QTL analysis to identify genes involved in the trade-off between silk protein synthesis and larva-pupa transition in silkworms
Source: Springer Nature journal article supplement (doi:10.1186/s12711-024-00937-z), 2024-09-30
Supplement: MOESM5 [file 12711_2024_937_MOESM5_ESM.pdf]

G0: 320 embryos injected, hatch 20, pupate 11, with 7 individuals showing positive edits

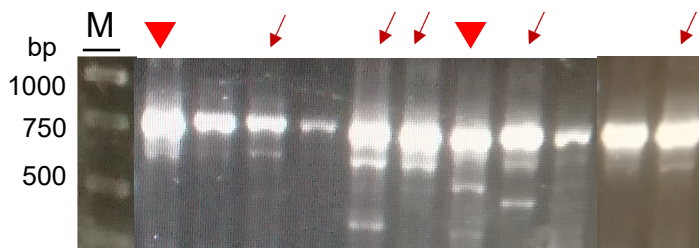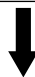

G1: 2 moth-arears reared, 174 individuals investigated, with 21 are transheterozygous

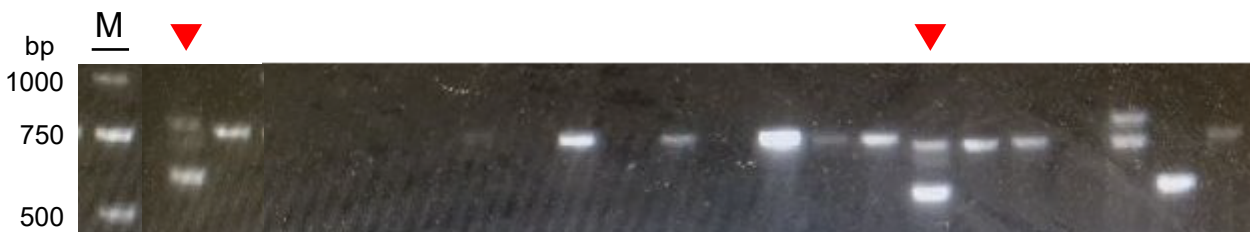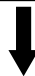

G2: 2 moth-arears reared, 168 individuals investigated, with 16 are homozygous

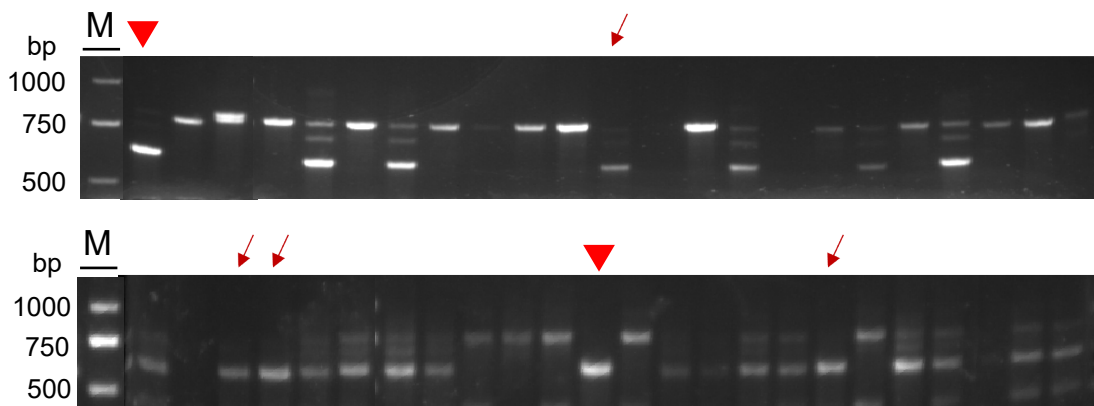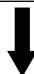

G3: 1 moth-arears and WT were reared simultaneously, and investigate the phenotypes
