# Supplementary material for: QTL analysis to identify genes involved in the trade-off between silk protein synthesis and larva-pupa transition in silkworms
Source: Springer Nature journal article supplement (doi:10.1186/s12711-024-00937-z), 2024-09-30

0.0 1.3 2.6 3.9 5.2 6.5 7.8 9.1 10.5 11.8 13.1 kb

*KWMTBOMO06473*

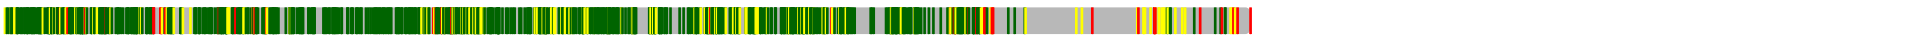

*KWMTBOMO06484*

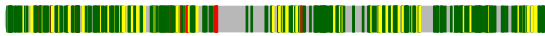

*KWMTBOMO06485*

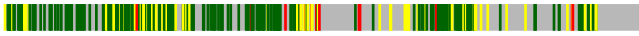

*KWMTBOMO06486*

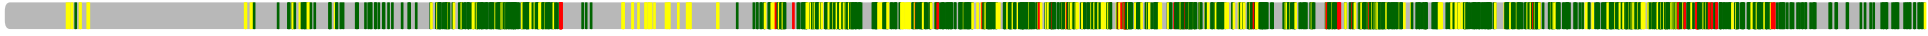

*KWMTBOMO06494*

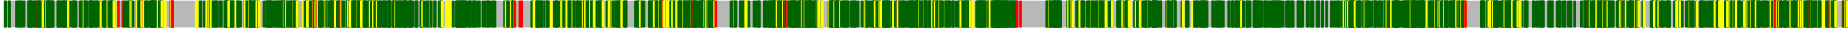

*KWMTBOMO06541*

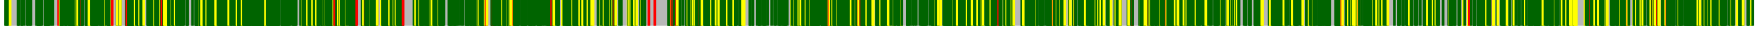

*KWMTBOMO06568*

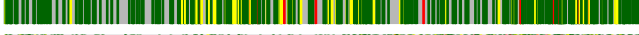

*KWMTBOMO06569*

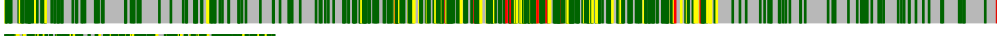

*KWMTBOMO06768*

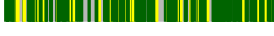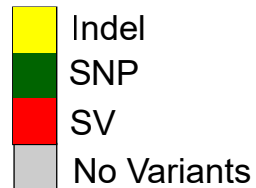

Supplement: MOESM12 [file 12711_2024_937_MOESM12_ESM.pdf]
