# Supplementary material for: QTL analysis to identify genes involved in the trade-off between silk protein synthesis and larva-pupa transition in silkworms
Source: Springer Nature journal article supplement (doi:10.1186/s12711-024-00937-z), 2024-09-30

# KWMTBOMO06568 (*BmCdt1*)

5' UTR

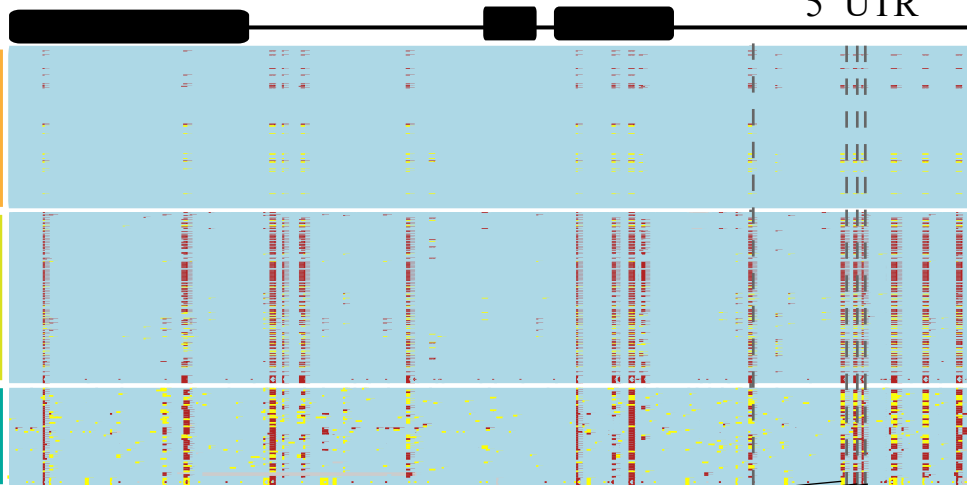

| SNP | -279 | -416 | -467 | -473 | -481 |
|-----|------|------|------|------|------|
| Ref | T    | C    | A    | T    | A    |
| Alt | A    | A    | G    | C    | G    |

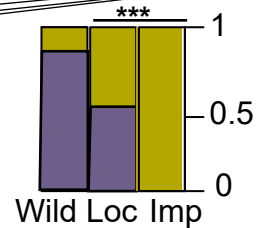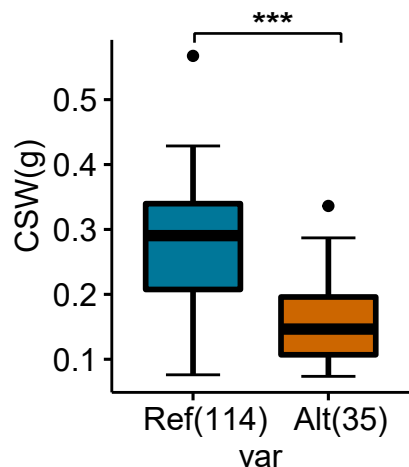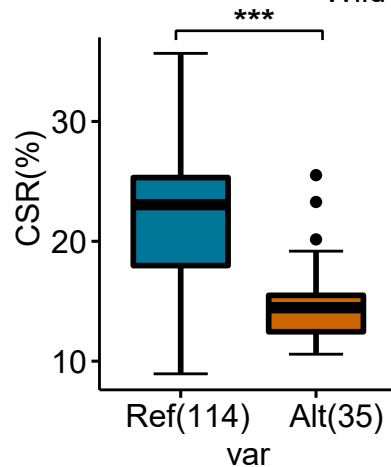

Supplement: MOESM15 [file 12711_2024_937_MOESM15_ESM.pdf]
