# Supplementary material for: QTL analysis to identify genes involved in the trade-off between silk protein synthesis and larva-pupa transition in silkworms
Source: Springer Nature journal article supplement (doi:10.1186/s12711-024-00937-z), 2024-09-30

**a**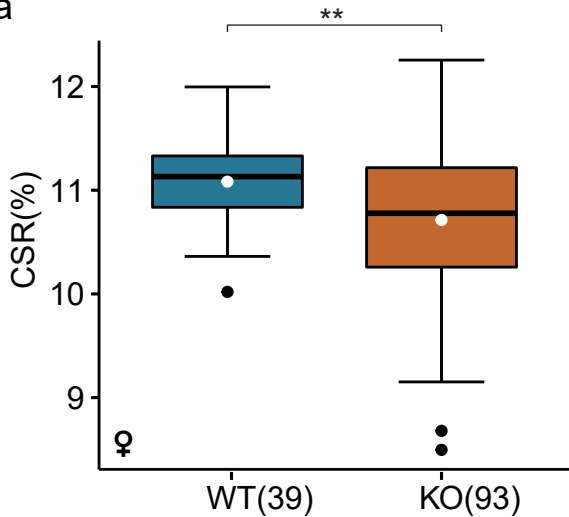**b**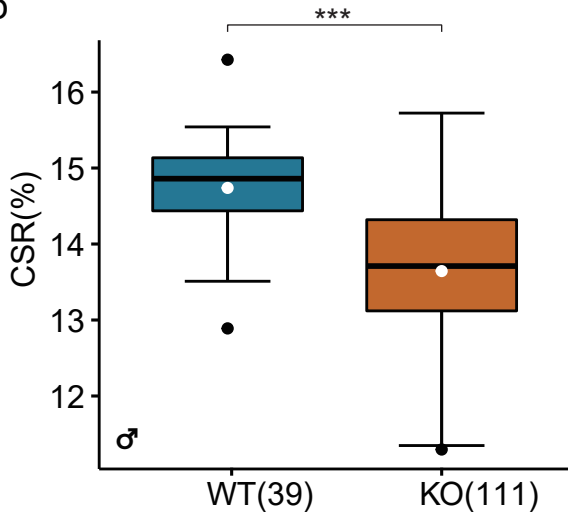

Supplement: MOESM16 [file 12711_2024_937_MOESM16_ESM.pdf]
